# Supplementary material for: Quantifying Next Generation Sequencing Sample Pre-Processing Bias in HIV-1 Complete Genome Sequencing
Source: MDPI journal article supplement (doi:10.3390/v8010012), 2016-01-07
Supplement: s1 [file s1]

# Supplementary Materials: Quantifying Next Generation Sequencing Sample Pre-Processing Bias in HIV-1 Complete Genome Sequencing

Bram Vrancken, Nidia Sequeira Trovão, Guy Baele, Eric van Wijngaerden, Anne-Mieke Vandamme, Kristel van Laethem and Philippe Lemey

**Table S1.** Overview of the amplicons and the number of replicate (RT-)PCR reactions per patient and per sample type.

| patient | amplicon name:         | gag-PR     | p2-RNaseH   | IN-Vif      | Vif-Vpr-Vpu | Env         | Nef         |
|---------|------------------------|------------|-------------|-------------|-------------|-------------|-------------|
|         | outer PCR <sup>a</sup> | 604 – 2796 | 1838 – 4650 | 3881 – 5955 | 4969 – 6571 | 5983 – 9144 | 8356 – 9598 |
|         | inner PCR <sup>a</sup> | 650 – 2596 | 1848 – 4637 | 4189 – 5773 | 5059 – 6440 | 6225 – 9057 | 8514 – 9598 |
|         | size <sup>d</sup>      | 1946       | 2789        | 1584        | 1381        | 2832        | 1084        |
| AR01    | plasma <sup>b</sup>    | [1-0],5    | [1-0],5     | [1-0],5     | -           | [1-0],5     | [1-0],5     |
|         | PBMC <sup>c</sup>      | 5,5        | 5,5         | 5,5         | 5,5         | 5,5         | 4,5         |
| AR05    | plasma <sup>b</sup>    | [1-5],5    | [1-5],5     | [1-5],5     | [0-5],5     | [1-5],5     | [1-5],5     |
|         | PBMC <sup>c</sup>      | -          | -           | -           | -           | -           | -           |
| AR06    | plasma <sup>b</sup>    | [0-5],5    | [0-5],5     | [0-5],5     | [0-5],5     | [0-5],5     | [0-5],5     |
|         | PBMC <sup>c</sup>      | -          | -           | -           | -           | -           | -           |
| AR07    | plasma <sup>b,e</sup>  | [1-5]      | [1-5]       | [1-5]       | [0-5]       | [1-5]       | [1-5]       |
|         | PBMC <sup>c</sup>      | 5,5        | 5,5         | 5,5         | 5,5         | 5,5         | 4,5         |

<sup>a</sup> The ranges indicate the covered region relative to the HXB2 reference genome.

<sup>b</sup> The numbers between brackets represent the number of respectively old and new RT-PCR reactions that were pooled. The last digit indicates the number of pooled replicate inner PCR reactions.

<sup>c</sup> The number of pooled replicate outer PCR respectively inner PCR reactions.

<sup>d</sup> amplicon length is expressed in nt.

<sup>e</sup> Unfortunately, due to a technical error, no inner PCR product of this patient's plasma sample could be sequenced.

**Table S2.** Overview of the used primers.

| Amplicon      |               | Primer Code | Position in the Genome <sup>a</sup> |      | Sequence (5'-3')                                     |
|---------------|---------------|-------------|-------------------------------------|------|------------------------------------------------------|
| gag-pr [1]    | Outer primers | KVL064      | 570                                 | 603  | GTT GTG TGA CTC TGG TAA CTA GAG<br>ATC CCT CAG A     |
|               |               | KVL065      | 2797                                | 2828 | TCC TAA TTG AAC YTC CCA RAA RTC YTG<br>AGT TC        |
|               | Inner primers | KVL066      | 626                                 | 649  | TCT CTA GCA GTG GCG CCC GAA CAG                      |
|               |               | KVL067      | 2597                                | 2623 | GGC CAT TGT TTA ACY TTT GGD CCA TCC                  |
| p2-RnaseH [2] | Outer primers | AV190-1     | 1810                                | 1837 | GCT ACA YTA GAA GAA ATG ATG ACA<br>GCA T             |
|               |               | CR1         | 4651                                | 4687 | GAT TCT ACT ACT CCT TGA CTT TGG GGA<br>TTG TAG GGA A |
|               | Inner primers | AV190-2     | 1817                                | 1847 | TAG AAG AAA TGA TGA CAG CAT GYC<br>AGG GAG T         |
|               |               | CR2         | 4669                                | 4638 | CTT TGG GGA TTG TAG GGA ATN CCA<br>AAT TCC TG        |
| in-vif [3]    | Outer primers | KVL068      | 3854                                | 3880 | AGG AGC AGA AAC TTW CTA TGT<br>AGA TGG               |
|               |               | KVL069      | 5956                                | 5981 | TTC TTC CTG CCA TAG GAR ATG<br>CCT AAG               |
|               | Inner primers | KVL071      | 5774                                | 5800 | CAG AAT TGG GTG YCR ACA TAG<br>CAG AAT               |
|               |               | KVL076      | 4161                                | 4188 | GCA CAY AAA GGR ATT GGA GGA AAT<br>GAA C             |

Table S2. *Cont.*

| Amplicon                 |               | Primer Code | Position in the Genome <sup>a</sup> |      | Sequence (5'-3')                           |
|--------------------------|---------------|-------------|-------------------------------------|------|--------------------------------------------|
| vif-vpr-vpu <sup>b</sup> | Outer primers | KVL144      | 4943                                | 4968 | AGC MAA RCT WCT CTG GAA AGG TGA AG         |
|                          |               | KVL145      | 6572                                | 6603 | GTA ACR CAG AGW GGG GTY AAY TTT ACA CAT GG |
|                          | Inner primers | KVL146      | 5030                                | 5058 | CAT TAR GGA YTA TGG AAA ACA GAT GGC AG     |
|                          |               | KVL147      | 6441                                | 6466 | TTG TGG GTT GGG GTC TGT RGG TAC AC         |
| env [4]                  | Outer primers | EnvA        | 5954                                | 5982 | GGC TTA GGC ATC TCC TAT GGC AGG AAG AA     |
|                          |               | KVL008 *    | 5284                                | 5308 | GGT CAK GGR GTC TCC ATA GAA TGG A          |
|                          |               | KVL009      | 9145                                | 9170 | GCC AAT CAG GGA AGW AGC CTT GTG T          |
|                          | Inner primers | envB        | 6198                                | 6224 | AGA AAG AGC AGA AGA CAG TGG CAA TGA        |
|                          |               | envM        | 9058                                | 9086 | TAG CCC TTC CAG TCC CCC CTT TTC TTT TA     |
|                          |               |             |                                     |      |                                            |
| nef <sup>b</sup>         | Outer primers | KVL072      | 8330                                | 8355 | AAT AGA GTT AGG MAG GGA TAC TCA CC         |
|                          |               | KVL073      | 9599                                | 9620 | ACT CAA GGC AAG CTT TAT TGA G              |
|                          | Inner primers | KVL074      | 8496                                | 8513 | GGA RCC TGT GCC TCT TCA                    |
|                          |               | KVL073      | 9599                                | 9620 | ACT CAA GGC AAG CTT TAT TGA G              |

<sup>a</sup> position is relative to the HXB2 reference genome. <sup>b</sup> developed in-house. \* PBMC outer sense primer.

Table S3. Impact of MID filtering and RC454 data cleaning.

| standard shearing     |                     | initial # reads | # reads after MID and transposon end sequence filtering | # reads after RC454 cleaning |
|-----------------------|---------------------|-----------------|---------------------------------------------------------|------------------------------|
| AR01                  | PBMC_innerPCR       | 37,001          | 36,352 (98.26)                                          | 34,640 (93.62)               |
|                       | plasma_innerPCR     | 42,055          | 41,379 (98.39)                                          | 40,678 (96.73)               |
| AR05                  | plasma_innerPCR     | 21,978          | 21,410 (97.42)                                          | 21,016 (95.62)               |
| AR06                  | plasma_innerPCR     | 15,883          | 15,432 (97.16)                                          | 14,856 (93.53)               |
| AR07                  | PBMC_innerPCR       | 48,882          | 47,882 (97.95)                                          | 44,334 (90.70)               |
|                       | plasma_innerPCR     | 43,661          | 42,793 (98.42)                                          | 41,681 (95.47)               |
| Nextera fragmentation |                     |                 |                                                         |                              |
| AR01 <sup>a</sup>     | PBMC_innerPCR_1     | 31,787          | 30,836 (97.00)                                          | 28,822 (90.76)               |
|                       | PBMC_innerPCR_2     | 33,609          | 32,555 (96.86)                                          | 30,262 (90.04)               |
|                       | plasma_innerPCR     | 26,329          | 25,397 (96.46)                                          | 24,366 (92.54)               |
| AR05 <sup>b</sup>     | plasma_innerPCR     | 30,124          | 28,889 (95.90)                                          | 27,903 (92.62)               |
|                       | plasma_outerPCR_r1  | 20,650          | 19,051 (92.26)                                          | 17,980 (87.07)               |
|                       | plasma_outerPCR_r2  | 63,986          | 57,782 (90.30)                                          | 46,925 (74.90)               |
| AR06 <sup>b</sup>     | plasma_innerPCR_r1a | 25,740          | 24,771 (96.29)                                          | 22,809 (88.61)               |
|                       | plasma_innerPCR_r1b | 16,056          | 14,798 (92.16)                                          | 14,077 (87.67)               |
|                       | plasma_innerPCR_r2a | 83,996          | 78,903 (93.94)                                          | 64,108 (76.32)               |
|                       | plasma_innerPCR_r2b | 53,894          | 50,771 (94.21)                                          | 41,322 (76.54)               |
|                       | plasma_outerPCR_r1  | 35,047          | 32,878 (93.81)                                          | 27,129 (77.41)               |
|                       | plasma_outerPCR_r2  | 106,681         | 94,066 (88.18)                                          | 67,767 (63.52)               |
| AR07 <sup>b</sup>     | PBMC_innerPCR       | 27,300          | 25,257 (92.52)                                          | 22,169 (81.21)               |
|                       | PBMC_outerPCR_r1    | 34,841          | 32,995 (94.70)                                          | 20,043 (57.53)               |
|                       | PBMC_outerPCR_r2    | 122,113         | 114,212 (93.53)                                         | 60,363 (49.43)               |
|                       | plasma_outerPCR_r1  | 14,757          | 13,861 (93.93)                                          | 13,017 (88.21)               |
|                       | plasma_outerPCR_r2  | 43,185          | 37,750 (87.41)                                          | 31,050 (71.90)               |

The number of reads per sample before and after the main read cleaning steps is given. The number between brackets corresponds to the fraction of the initial total number of reads that are considered for further analysis.

<sup>a</sup> Data for the PBMC inner PCR product were obtained using two emPCR conditions (0.15 and 0.30 cpb) at the same run.

<sup>b</sup> Data for some of these samples were obtained over 2 runs because the coverage profiles obtained after the first one were indicative for an insufficient in-depth view at multiple positions. The data marked 'r1' were obtained from 1/4<sup>th</sup> PTP during the first run. The data marked 'r2' were obtained from 1/2<sup>nd</sup> PTP during the second run. Due to a technical error the Nextera<sup>TM</sup> fragmented inner PCR product of sample AR06 was sequenced twice during each run; the subsamples are indicated with "a" and "b".

**Table S4.** Overview of the available clonal and population sequences.

| patient | gag-PR | p2RNaseH | IN-Vif | Vif-Vpr-Vpu | gp160 | Nef |
|---------|--------|----------|--------|-------------|-------|-----|
| AR01    | pop    | clonal   | pop    | -           | pop   | pop |
| AR05    | pop    | clonal   | pop    | -           | pop   | pop |
| AR06    | -      | clonal   | -      | -           | -     | -   |
| AR07    | pop    | clonal   | pop    | -           | pop   | pop |

pop = population sequence available

clonal = clonal sequence available.

- = no patient-specific sequence available

**Table S9.** Expected number of difference RNA copies available for cDNA synthesis in relation to the viral load.

| patient | viral load <sup>a</sup> | expected input copy number for extraction <sup>b</sup> | expected input copy number for cDNA synthesis <sup>c</sup> | cutoff (%) <sup>d</sup> |
|---------|-------------------------|--------------------------------------------------------|------------------------------------------------------------|-------------------------|
| plasma  |                         |                                                        |                                                            |                         |
| AR01    | 4,876                   | 683                                                    | 102                                                        | 0.98                    |
| AR05    | 159,697                 | 22,358                                                 | 3,726                                                      | 0.03                    |
| AR06    | 83,176                  | 11,644                                                 | 1,746                                                      | 0.06                    |
| AR07    | 57,544                  | 8,056                                                  | 1,343                                                      | 0.07                    |
| PBMC    |                         |                                                        |                                                            |                         |
| AR01    | 10-1,000                | 9- 860                                                 | 1-103                                                      | 100 - 0.97              |
| AR07    | 30-3,000                | 18-2,580                                               | 3-309                                                      | 33-0.32                 |

<sup>a</sup>: expressed in copies/mL for the plasma samples. For the PBMC samples, we based the calculations on a proviral load of 1 per 10<sup>3</sup> to 1 per 10<sup>5</sup> PBMCs [5]. For sample AR01 we started from 1\*10<sup>6</sup> and for sample AR07 from 3\*10<sup>6</sup> PBMCs.

<sup>b</sup>: for an extraction starting with 140μL plasma and 200μL PBMC solution.

<sup>c</sup>: based on the minimal advertised recovery yield of 90% at any viral load for plasma samples and 86% for provirus extraction for the used elution volume of 50μL (<http://www.qiagen.com/>), and assuming 10μL input for the amplification of the plasma samples, and 6μL for the PBMC samples.

<sup>d</sup> the biologically meaningful lower limit of detection.

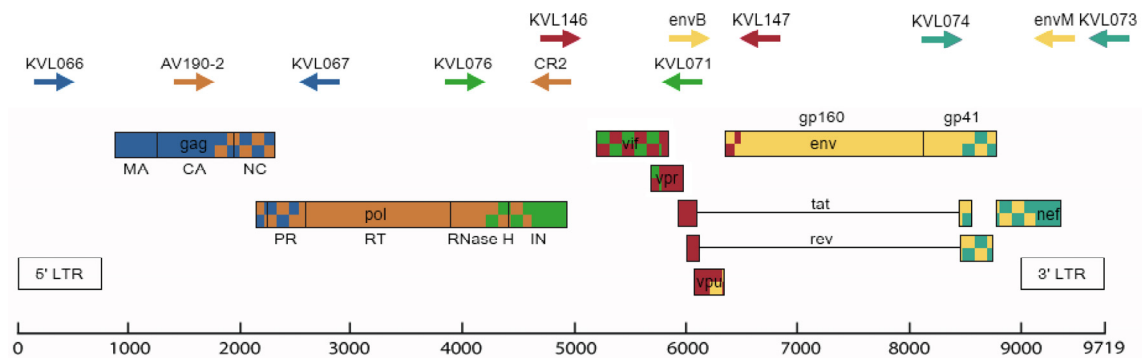**Figure S1.** Schematic overview of the overlapping amplicons used for the near full genome amplification of HIV-1. Colored arrows indicate forward and reverse primers, with names corresponding to the primer's names in Table S2.

|                         | Gag-PR                               |                                          |     | P2-RNaseH                            |                                          |     | In-Vif                               |                                          |
|-------------------------|--------------------------------------|------------------------------------------|-----|--------------------------------------|------------------------------------------|-----|--------------------------------------|------------------------------------------|
|                         | concentration<br>\\ volume           | cycling conditions                       |     | concentration<br>\\ volume           | cycling conditions                       |     | concentration<br>\\ volume           | cycling conditions                       |
| reaction mix            | 1x                                   | <i>RNA incubation</i><br>65°C 30"        |     | 1x                                   | <i>RNA incubation</i><br>65°C 30"        |     | 1x                                   | <i>RNA incubation</i><br>65°C 30"        |
| sense primer            | 0,2µM                                | 55°C 5'                                  |     | 0,2µM                                | 55°C 5'                                  |     | 0,2µM                                | 55°C 5'                                  |
| antisense primer        | 0,2µM                                | <i>Reverse Transcription</i><br>55°C 30' |     | 0,2µM                                | <i>Reverse Transcription</i><br>55°C 30' |     | 0,2µM                                | <i>Reverse Transcription</i><br>55°C 30' |
| MgSO <sub>4</sub>       | 0,8mM                                | 55°C 30'                                 |     | 1,3mM                                | 55°C 30'                                 |     | 1,05mM                               | 55°C 30'                                 |
| Superscript III/Plat HF | 1µL                                  | <i>PCR cycling profile</i><br>94°C 2'    |     | 1µL                                  | <i>PCR cycling profile</i><br>94°C 2'    |     | 1µL                                  | <i>PCR cycling profile</i><br>94°C 2'    |
| RNA protector           | 10U                                  | 94°C 15"                                 |     | 10U                                  | 94°C 15"                                 |     | 10U                                  | 94°C 15"                                 |
| RNA/DNA extract         | 10µL/6µL                             | 57°C 30'                                 | 40x | 10µL/6µL                             | 61°C 30'                                 | 40x | 10µL/6µL                             | 53°C 30'                                 |
| H <sub>2</sub> O        | add until final<br>volume of<br>50µL | 68°C 2'                                  |     | add until final<br>volume of<br>50µL | 68°C 3'                                  |     | add until final<br>volume of<br>50µL | 68°C 2'30"                               |
|                         |                                      | 4°C infinite                             |     |                                      | 4°C infinite                             |     |                                      | 4°C infinite                             |

  

|                         | Vif-Vpr-Vpu                          |                                          |     | Env                                  |                                          |     | Nef                                  |                                          |
|-------------------------|--------------------------------------|------------------------------------------|-----|--------------------------------------|------------------------------------------|-----|--------------------------------------|------------------------------------------|
|                         | concentration<br>\\ volume           | cycling conditions                       |     | concentration<br>\\ volume           | cycling conditions                       |     | concentration<br>\\ volume           | cycling conditions                       |
| reaction mix            | 1x                                   | <i>RNA incubation</i><br>65°C 30"        |     | 1x                                   | <i>RNA incubation</i><br>65°C 30"        |     | 1x                                   | <i>RNA incubation</i><br>65°C 30"        |
| sense primer            | 0,2µM                                | 55°C 5'                                  |     | 0,2µM                                | 55°C 5'                                  |     | 0,2µM                                | 55°C 5'                                  |
| antisense primer        | 0,2µM                                | <i>Reverse Transcription</i><br>55°C 30' |     | 0,2µM                                | <i>Reverse Transcription</i><br>55°C 30' |     | 0,2µM                                | <i>Reverse Transcription</i><br>55°C 30' |
| MgSO <sub>4</sub>       | 1mM                                  | 55°C 30'                                 |     | /                                    | 55°C 30'                                 |     | 1,05mM                               | 55°C 30'                                 |
| Superscript III/Plat HF | 1µL                                  | <i>PCR cycling profile</i><br>94°C 2'    |     | 1µL                                  | <i>PCR cycling profile</i><br>94°C 1'30" |     | 1µL                                  | <i>PCR cycling profile</i><br>94°C 2'    |
| RNA protector           | 10U                                  | 94°C 15"                                 |     | 10U                                  | 94°C 15"                                 |     | 10U                                  | 94°C 15"                                 |
| RNA/DNA extract         | 10µL/6µL                             | 54°C 30'                                 | 40x | 10µL/6µL                             | 55°C 30'                                 | 40x | 10µL/10µL                            | 56°C 30'                                 |
| H <sub>2</sub> O        | add until final<br>volume of<br>50µL | 68°C 2'                                  |     | add until final<br>volume of<br>50µL | 68°C 2'                                  |     | add until final<br>volume of<br>50µL | 68°C 2'                                  |
|                         |                                      | 4°C infinite                             |     |                                      | 4°C infinite                             |     |                                      | 4°C infinite                             |

**Figure S2.** Overview of the reaction mixes and cycling conditions for the (RT-)PCR reactions.

|                                                                               | Gag-PR                               |                                               |     | P2-RNaseH                            |                                       |     | IN-Vif                               |                                               |
|-------------------------------------------------------------------------------|--------------------------------------|-----------------------------------------------|-----|--------------------------------------|---------------------------------------|-----|--------------------------------------|-----------------------------------------------|
|                                                                               | concentration<br>/ volume            | cycling conditions                            |     | concentration<br>/ volume            | cycling conditions                    |     | concentration<br>/ volume            | cycling conditions                            |
| <b>mix 1</b><br>dNTP<br>sense primer<br>antisense primer<br>outer PCR product | 200µM<br>0,4µM<br>0,4µM<br>5µL       | <i>PCR cycling profile</i><br>95°C 2'         |     | 200µM<br>0,5µM<br>0,5µM<br>2µL       | <i>PCR cycling profile</i><br>94°C 2' |     | 200µM<br>0,4µM<br>0,4µM<br>5µL       | <i>PCR cycling profile</i><br>95°C 2'         |
|                                                                               |                                      | 95°C 15"<br>58°C 30'<br>68°C 2'30"            | 10x |                                      | 94°C 15"<br>59°C 30'<br>68°C 3'       | 30x |                                      | 95°C 15"<br>55°C 30'<br>68°C 2'30"            |
| <b>mix 2</b><br>buffer<br>MgCl <sub>2</sub><br>Expand HF Enzyme               | 1x<br>2mM<br>2,65U                   | 95°C 15"<br>58°C 30'<br>68°C 2'30" + 5"/cycle | 30x | 1x<br>2mM<br>2,65U                   | 4°C infinite                          |     | 1x<br>2mM<br>2,65U                   | 95°C 15"<br>55°C 30'<br>68°C 2'30" + 5"/cycle |
| H <sub>2</sub> O                                                              | add until final<br>volume of<br>25µL | 4°C infinite                                  |     | add until final<br>volume of<br>25µL |                                       |     | add until final<br>volume of<br>25µL | 4°C infinite                                  |

  

|                                                                               | Vif-Vpr-Vpu                          |                                       |     | Nef                                  |                                            |
|-------------------------------------------------------------------------------|--------------------------------------|---------------------------------------|-----|--------------------------------------|--------------------------------------------|
|                                                                               | concentration<br>/ volume            | cycling conditions                    |     | concentration<br>/ volume            | cycling conditions                         |
| <b>mix 1</b><br>dNTP<br>sense primer<br>antisense primer<br>outer PCR product | 400µM<br>0,8µM<br>0,8µM<br>5µL       | <i>PCR cycling profile</i><br>94°C 2' |     | 400µM<br>0,4µM<br>0,4µM<br>5µL       | <i>PCR cycling profile</i><br>95°C 2'      |
|                                                                               |                                      | 94°C 15"<br>56°C 30'<br>68°C 1'30"    | 40x |                                      | 95°C 15"<br>53°C 30'<br>72°C 1'            |
| <b>mix 2</b><br>buffer<br>MgCl <sub>2</sub><br>Expand HF Enzyme               | 1x<br>2mM<br>2,65U                   | 4°C infinite                          |     | 1x<br>2mM<br>2,65U                   | 95°C 15"<br>58°C 30'<br>72°C 1' + 1"/cycle |
| H <sub>2</sub> O                                                              | add until final<br>volume of<br>25µL |                                       |     | add until final<br>volume of<br>25µL | 4°C infinite                               |

  

|                                                                                                             | Env                                               |                                                                                                                              |
|-------------------------------------------------------------------------------------------------------------|---------------------------------------------------|------------------------------------------------------------------------------------------------------------------------------|
|                                                                                                             | concentration<br>/ volume                         | cycling conditions                                                                                                           |
| buffer<br>sense primer<br>antisense primer<br>MgSO <sub>4</sub><br>dNTP<br>Plat Taq HF<br>outer PCR product | 1x<br>0,2µM<br>0,2µM<br>2mM<br>200µM<br>1U<br>1µL | <i>PCR cycling profile</i><br>94°C 1'30"<br>94°C 15"<br>55°C 30'<br>68°C 2'45"<br>94°C 15"<br>55°C 30'<br>68°C 3' + 1"/cycle |
| H <sub>2</sub> O                                                                                            | add until final<br>volume of<br>50µL              | 4°C infinite                                                                                                                 |

**Figure S3.** Overview of the reaction mixes and cycling conditions for the second round of amplification.

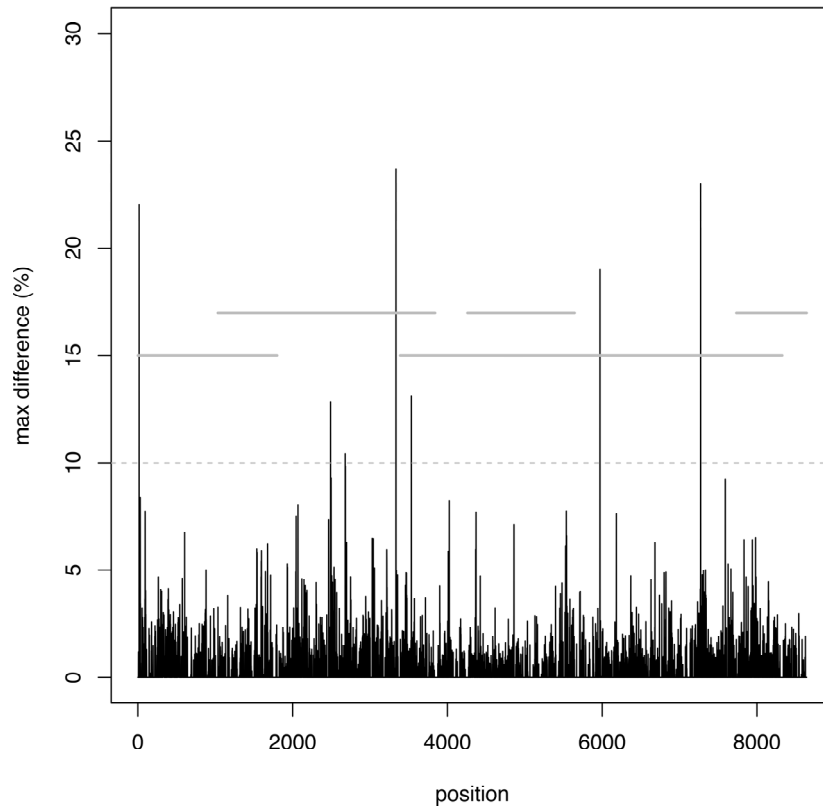

**Figure S4.** emPCR/sequencing variability of the PBMC inner PCR product for patient AR01. Bars indicate the largest difference in observed nucleotide frequency along the axis of the patient-specific reference sequence. Only positions with coverage  $\geq 10$  in both samples are taken into account.

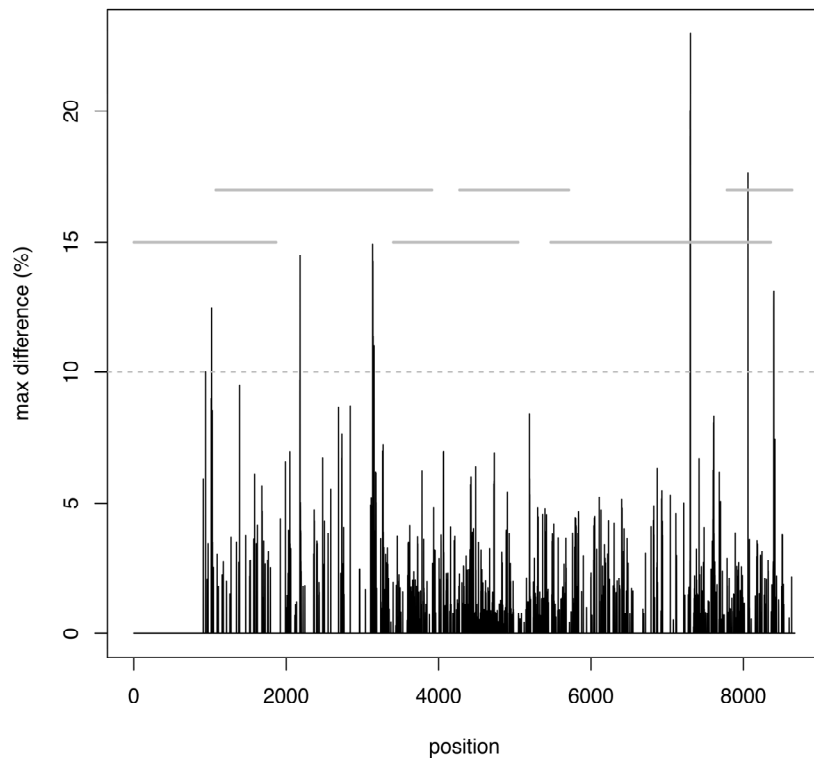

**Figure S5.** emPCR/sequencing variability of the plasma outer PCR product for patient AR05. Bars indicate the largest difference in observed nucleotide frequency along the axis of the patient-specific reference sequence. Only positions with coverage  $\geq 10$  in both samples are taken into account.

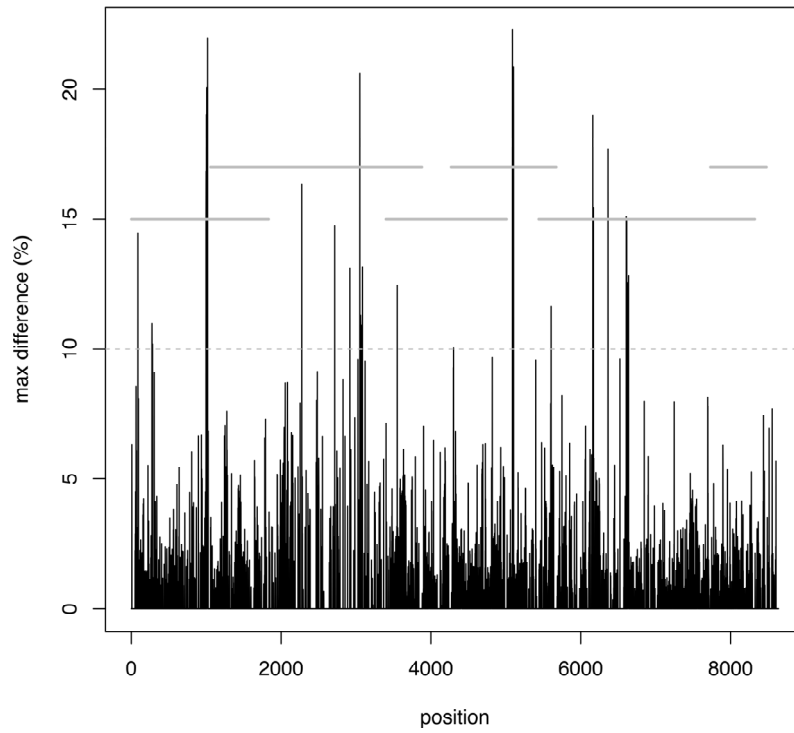

**Figure S6.** emPCR/sequencing variability of the plasma inner PCR product (1a *vs.* 2a) for patient AR06. Bars indicate the largest difference in observed nucleotide frequency along the axis of the patient-specific reference sequence. Only positions with coverage  $\geq 10$  in both samples are taken into account.

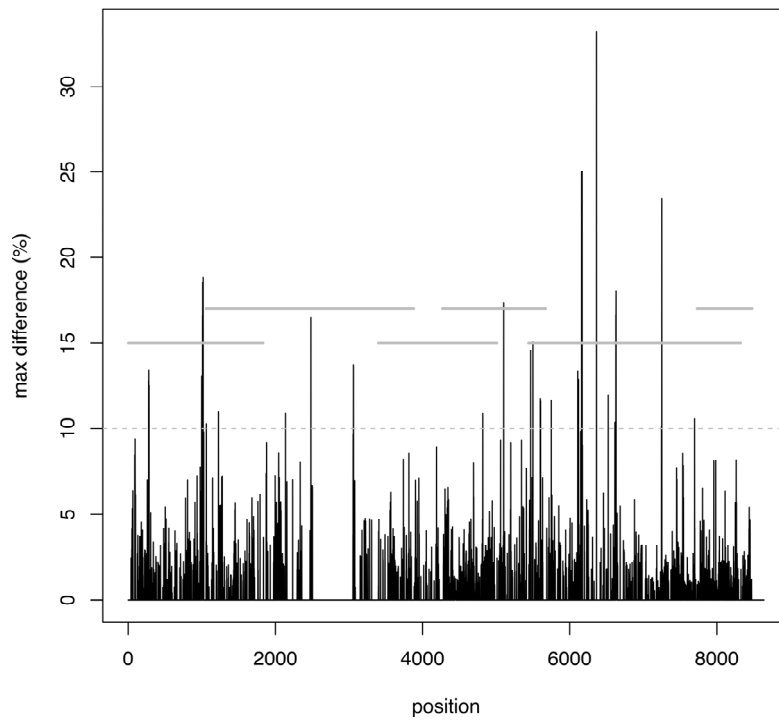

**Figure S7.** emPCR/sequencing variability of the plasma inner PCR product (1b *vs.* 2b) for patient AR06. Bars indicate the largest difference in observed nucleotide frequency along the axis of the patient-specific reference sequence. Only positions with coverage  $\geq 10$  in both samples are taken into account.

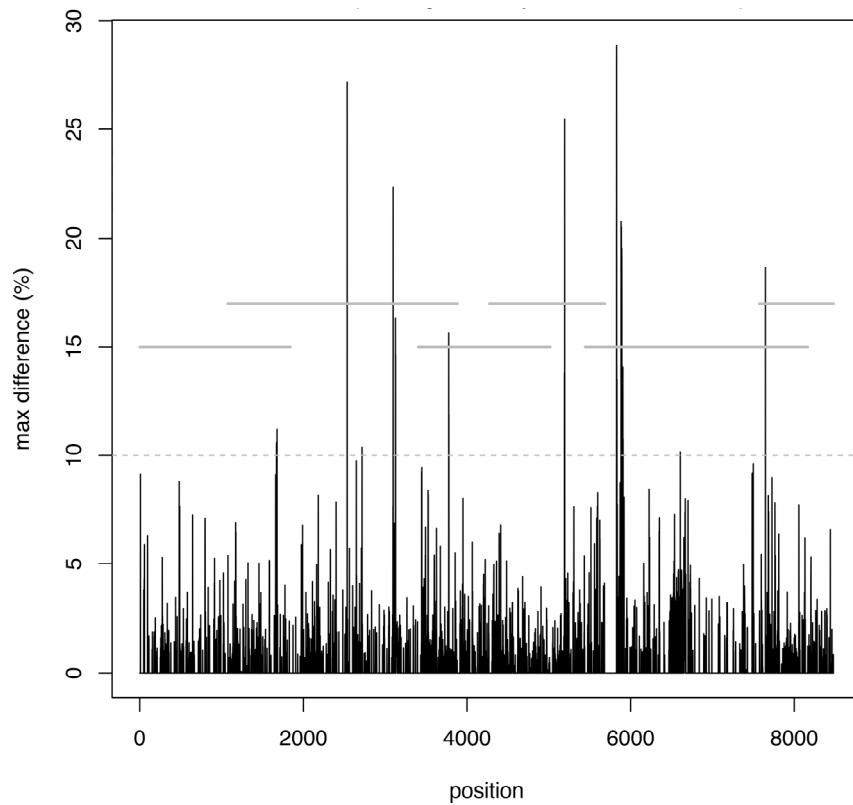

**Figure S8.** emPCR/sequencing variability of the PBMC outer PCR product for patient AR07. Bars indicate the largest difference in observed nucleotide frequency along the axis of the patient-specific reference sequence. Only positions with coverage  $\geq 10$  in both samples are taken into account.

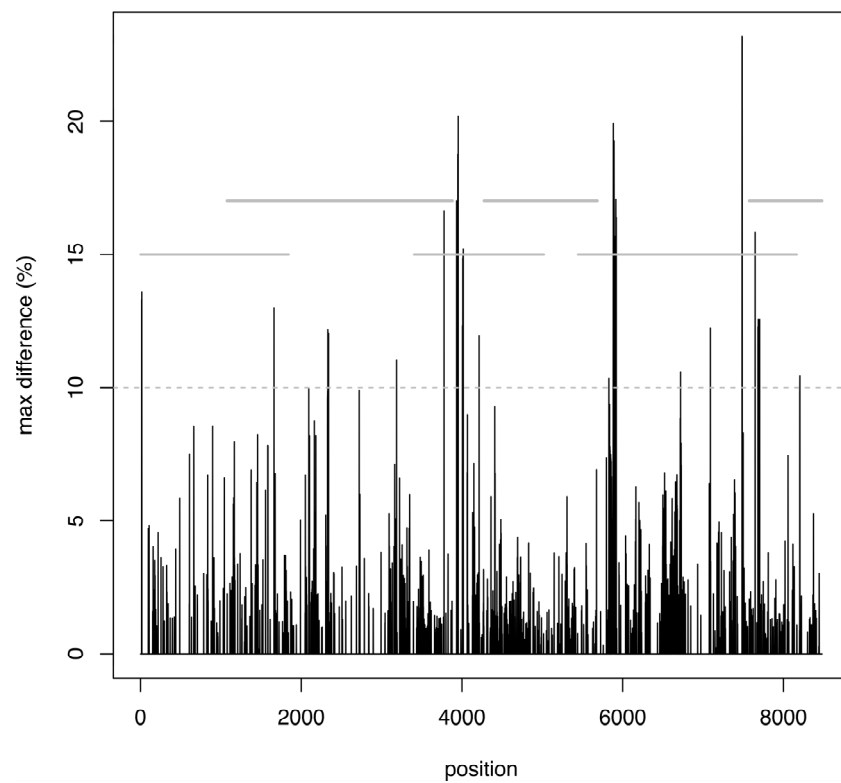

**Figure S9.** emPCR/sequencing variability of the plasma outer PCR product for patient AR07. Bars indicate the largest difference in observed nucleotide frequency along the axis of the patient-specific reference sequence. Only positions with coverage  $\geq 10$  in both samples are taken into account.

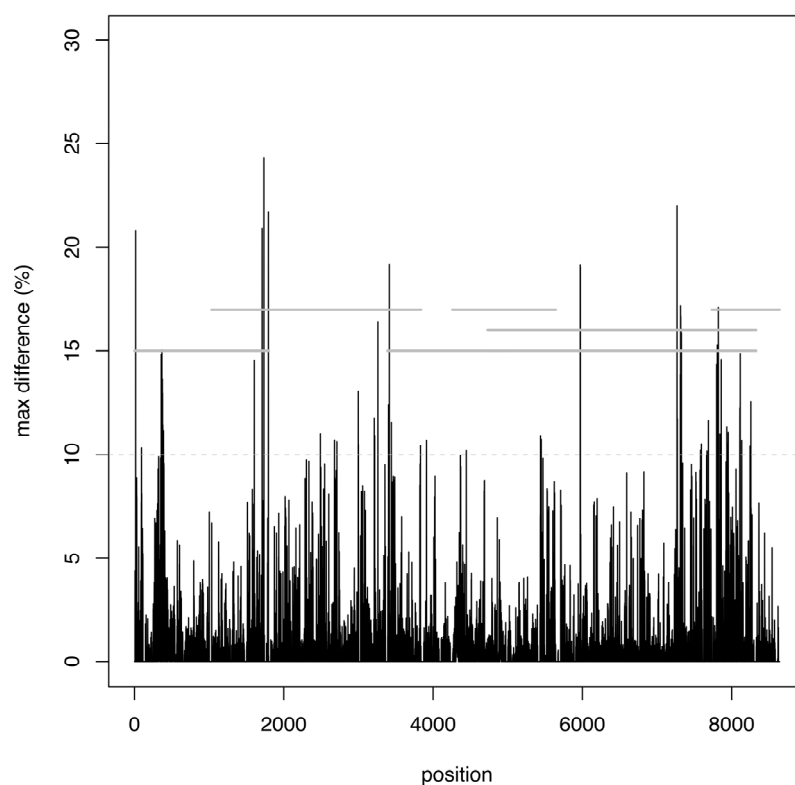

**Figure S10.** Fragmentation protocol associated variability of the PBMC inner PCR product for patient AR01. Bars indicate the largest difference in observed nucleotide frequency along the axis of the patient-specific reference sequence. Only positions with coverage  $\geq 10$  in both samples are taken into account.

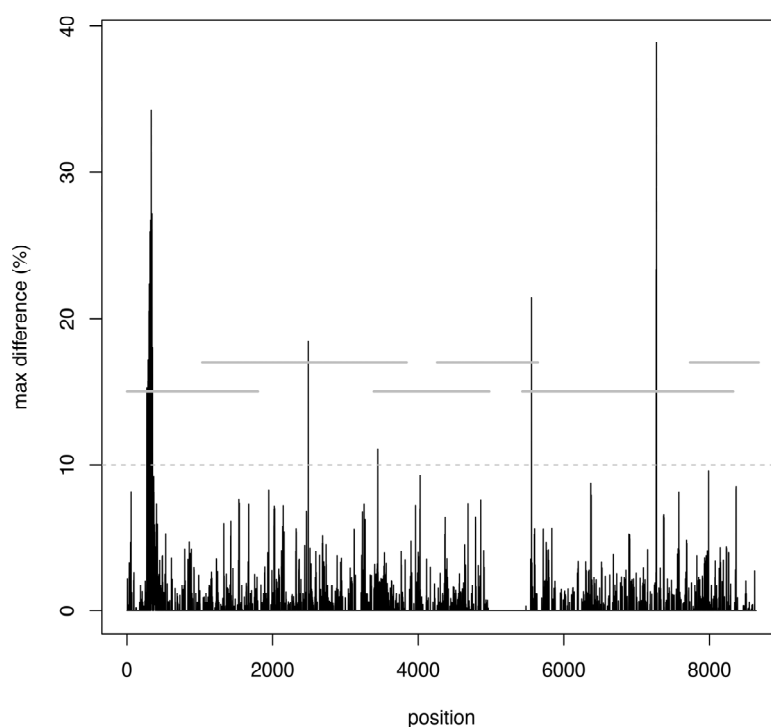

**Figure S11.** Fragmentation protocol associated variability of the plasma inner PCR product for patient AR01. Bars indicate the largest difference in observed nucleotide frequency along the axis of the patient-specific reference sequence. Only positions with coverage  $\geq 10$  in both samples are taken into account.



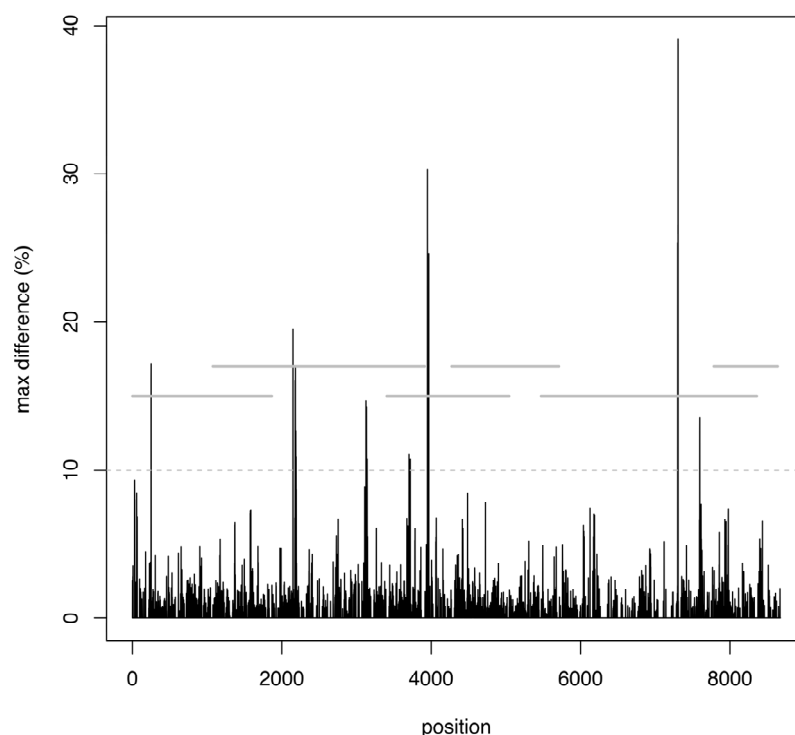

**Figure S12.** Fragmentation protocol associated variability of the plasma inner PCR product for patient AR05. Bars indicate the largest difference in observed nucleotide frequency along the axis of the patient-specific reference sequence. Only positions with coverage  $\geq 10$  in both samples are taken into account.

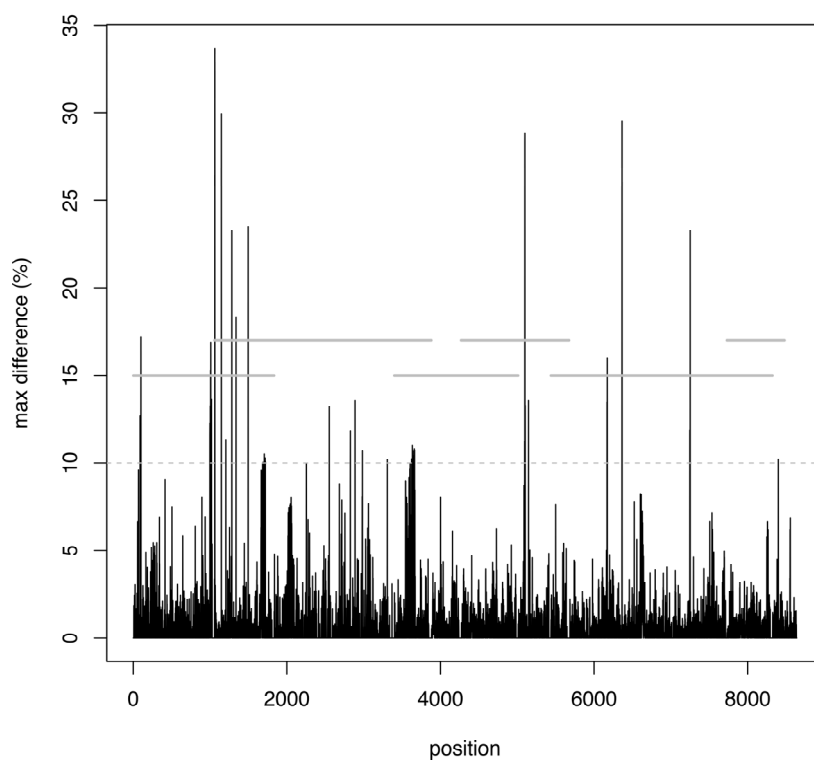

**Figure S13.** Fragmentation protocol associated variability of the plasma inner PCR product for patient AR06. Bars indicate the largest difference in observed nucleotide frequency along the axis of the patient-specific reference sequence. Only positions with coverage  $\geq 10$  in both samples are taken into account.

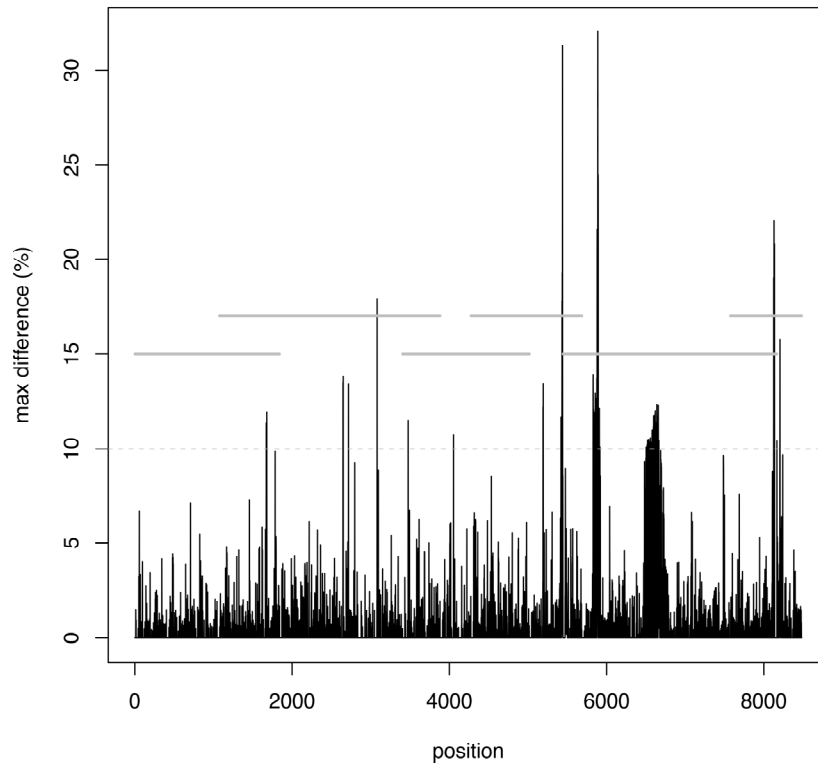

**Figure S14.** Fragmentation protocol associated variability of the PBMC inner PCR product for patient AR07. Bars indicate the largest difference in observed nucleotide frequency along the axis of the patient-specific reference sequence. Only positions with coverage  $\geq 10$  in both samples are taken into account.

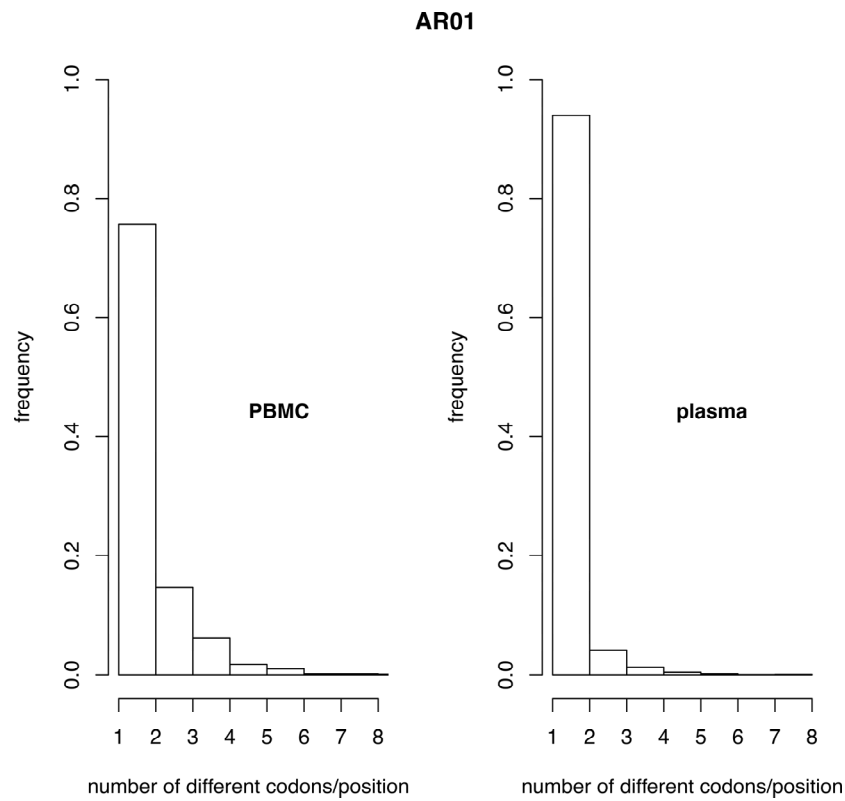

**Figure S15.** Histograms representing the per position diversity in the PBMC and plasma compartments of patient AR01.

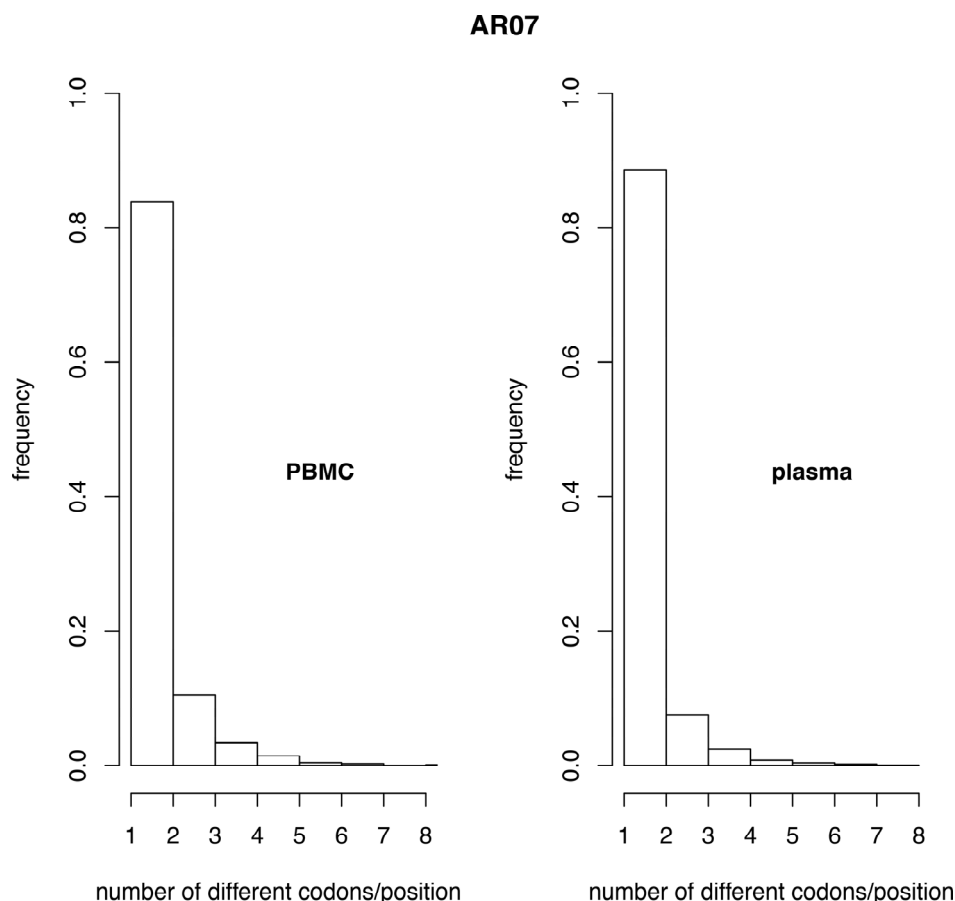

**Figure S16.** Histograms representing the per position diversity in the PBMC and plasma compartments of patient AR07.

## References

1. Van Laethem, K.; Schrooten, Y.; Dedeker, S.; van Heeswijck, L.; Deforche, K.; van Wijngaerden, E.; van Ranst, M.; Vandamme, A.M. A genotypic assay for the amplification and sequencing of gag and protease from diverse human immunodeficiency virus type 1 group M subtypes. *J. Virol. Methods* **2006**, *132*, 181–186.
2. Snoeck, J.; Riva, C.; Steegen, K.; Schrooten, Y.; Maes, B.; Vergne, L.; van Laethem, K.; Peeters, M.; Vandamme, A.M. Optimization of a genotypic assay applicable to all human immunodeficiency virus type 1 protease and reverse transcriptase subtypes. *J. Virol. Methods* **2005**, *128*, 47–53.
3. Van Laethem, K.; Schrooten, Y.; Covens, K.; Dekeersmaeker, N.; de Munter, P.; van Wijngaerden, E.; van Ranst, M.; Vandamme, A.M. A genotypic assay for the amplification and sequencing of integrase from diverse HIV-1 group M subtypes. *J. Virol. Methods* **2008**, *153*, 176–181.
4. Covens, K.; Dekeersmaeker, N.; Schrooten, Y.; Weber, J.; Schols, D.; Quiñones-Mateu, M.E.; Vandamme, A.M.; van Laethem, K. Novel recombinant virus assay for measuring susceptibility of human immunodeficiency virus type 1 group M subtypes to clinically approved drugs. *J. Clin. Microbiol.* **2009**, *47*, 2232–2242.
5. Liu, S.L.; Rodrigo, A.G.; Shankarappa, R.; Learn, G.H.; Hsu, L.; Davidov, O.; Zhao, L.P.; Mullins, J.I. HIV quasiespecies and resampling. *Science* **1996**, *173*, 415–416.

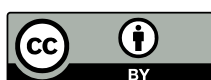

© 2016 by the authors; licensee MDPI, Basel, Switzerland. This article is an open access article distributed under the terms and conditions of the Creative Commons by Attribution (CC-BY) license (<http://creativecommons.org/licenses/by/4.0/>).
